# Supplementary material for: O-GlcNAc glycosylation orchestrates fate decision and niche function of bone marrow stromal progenitors
Source: eLife journal article supplement (doi:10.7554/elife.85464), 2023-03-02
Supplement: supp [file elife-85464-supp-v1.zip]

## Sheet: S1.Allresults
Acc #	Gene	Protein Name	% Cov	M+H	m/z	z	ppm	Prev AA	DB Peptide	Next AA	Peptide	Protein Mods	M Cl	Fraction	RT	MSMS Info	Start	Score	Expect	Protein MW
userPPARg2	PPARg2recomb	PPARg2	60.5	1652.79	551.601	3	0.7	K	LISEEDLLMAMEAR	I	LISEEDLLM(Oxidation)AM(Oxidation)EAR	Oxidation@15;Oxidation@17	0	Z20190122-03_FTMSms2EThcd	44.288	7845	7	51.5	2e-11	60309
userPPARg3	PPARg2recomb	PPARg2	60.5	1636.8	546.27	3	2.8	K	LISEEDLLMAMEAR	I	LISEEDLLM(Oxidation)AMEAR	Oxidation@15=28	0	Z20190122-03_FTMSms2EThcd	59.862	10538	7	47.6	1.2e-09	60309
userPPARg4	PPARg2recomb	PPARg2	60.5	1636.79	818.901	2	1.3	K	LISEEDLLMAMEAR	I	LISEEDLLMAM(Oxidation)EAR	Oxidation@17=14	0	Z20190122-03_FTMSms2EThcd	48.031	8533	7	60.5	7.4e-09	60309
userPPARg5	PPARg2recomb	PPARg2	60.5	1620.8	810.903	2	0.35	K	LISEEDLLMAMEAR	I	LISEEDLLMAMEAR		0	Z20190122-03_FTMSms2EThcd	61.638	10824	7	25	1.1e-05	60309
userPPARg6	PPARg2recomb	PPARg2	60.5	1025.46	513.234	2	-0.097	R	ADPMVADYK	Y	ADPM(Oxidation)VADYK	Oxidation@113	0	Z20190122-03_FTMSms2EThcd	15.825	2537	110	46.4	5.7e-06	60309
userPPARg7	PPARg2recomb	PPARg2	60.5	1544.73	515.582	3	1.1	R	ADPMVADYKYDLK	L	ADPM(Oxidation)VADYKYDLK	Oxidation@113	1	Z20190122-03_FTMSms2EThcd	27.428	4797	110	52.3	3.3e-09	60309
userPPARg8	PPARg2recomb	PPARg2	60.5	1009.47	505.236	2	-0.18	R	ADPMVADYK	Y	ADPMVADYK		0	Z20190122-03_FTMSms2EThcd	18.195	3087	110	40.9	2.1e-06	60309
userPPARg9	PPARg2recomb	PPARg2	60.5	1528.74	510.25	3	0.75	R	ADPMVADYKYDLK	L	ADPMVADYKYDLK		1	Z20190122-03_FTMSms2EThcd	34.525	6088	110	45.1	7.5e-08	60309
userPPARg10	PPARg2recomb	PPARg2	60.5	2630.29	877.435	3	1	K	LQEYQSAIKVEPASPPYYSEK	T	LQEYQS(HexNAc)AIKVEPASPPYYSEK	HexNAc@128=62	1	Z20190122-03_FTMSms2EThcd	37.162	6557	123	47.2	1e-09	60309
userPPARg11	PPARg2recomb	PPARg2	60.5	2507.17	836.396	3	0.31	K	LQEYQSAIKVEPASPPYYSEK	T	LQEYQSAIKVEPAS(Phospho)PPYYSEK	Phospho@136=16	1	Z20190122-03_FTMSms2EThcd	42.903	7589	123	65.2	1.3e-12	60309
userPPARg12	PPARg2recomb	PPARg2	60.5	2427.21	809.741	3	0.25	K	LQEYQSAIKVEPASPPYYSEK	T	LQEYQSAIKVEPASPPYYSEK		1	Z20190122-03_FTMSms2EThcd	38.841	6844	123	69	5.7e-13	60309
userPPARg13	PPARg2recomb	PPARg2	60.5	1446.62	482.878	3	-0.42	K	VEPASPPYYSEK	T	VEPAS(Phospho)PPYYSEK	Phospho@136=25	0	Z20190122-03_FTMSms2EThcd	29.873	5260	132	39.3	9e-10	60309
userPPARg14	PPARg2recomb	PPARg2	60.5	1366.65	456.222	3	-0.57	K	VEPASPPYYSEK	T	VEPASPPYYSEK		0	Z20190122-03_FTMSms2EThcd	20.108	3446	132	46.5	1.7e-07	60309
userPPARg15	PPARg2recomb	PPARg2	60.5	2764.27	691.822	4	-0.27	K	TQLYNRPHEEPSNSLMAIECR	V	TQLYNRPHEEPSNS(HexNAc)LM(Oxidation)AIEC(Carbamidomethyl)R	HexNAc@157=20;Oxidation@159	0	Z20190122-03_FTMSms2EThcd	26.784	4689	144	52.8	1.6e-10	60309
userPPARg16	PPARg2recomb	PPARg2	60.5	2748.27	687.823	4	-0.08	K	TQLYNRPHEEPSNSLMAIECR	V	TQLYNRPHEEPSNS(HexNAc)LMAIEC(Carbamidomethyl)R	HexNAc@157=17	0	Z20190122-03_FTMSms2EThcd	31.418	5555	144	53.5	2e-09	60309
userPPARg17	PPARg2recomb	PPARg2	60.5	2561.18	854.4	3	-0.89	K	TQLYNRPHEEPSNSLMAIECR	V	TQLYNRPHEEPSNSLM(Oxidation)AIEC(Carbamidomethyl)R	Oxidation@159	0	Z20190122-03_FTMSms2EThcd	29.537	5196	144	64.9	4.3e-13	60309
userPPARg18	PPARg2recomb	PPARg2	60.5	2545.2	849.071	3	1.9	K	TQLYNRPHEEPSNSLMAIECR	V	TQLYNRPHEEPSNSLMAIEC(Carbamidomethyl)R		0	Z20190122-03_FTMSms2EThcd	33.01	5830	144	72.2	3.6e-12	60309
userPPARg19	PPARg2recomb	PPARg2	60.5	1679.71	560.574	3	0.55	K	ASGFHYGVHACEGCK	G	ASGFHYGVHAC(Carbamidomethyl)EGC(Carbamidomethyl)K		0	Z20190122-03_FTMSms2EThcd	16.787	2742	170	60.7	1.7e-14	60309
userPPARg20	PPARg2recomb	PPARg2	60.5	1290.79	430.935	3	0.012	R	TIRLKLIYDR	C	TIRLKLIYDR		2	Z20190122-03_FTMSms2EThcd	30.159	5316	190	39.3	6.2e-13	60309
userPPARg21	PPARg2recomb	PPARg2	60.5	1738.87	435.474	4	-0.32	R	LKLIYDRCDLNCR	I	LKLIYDRC(Carbamidomethyl)DLNC(Carbamidomethyl)R		2	Z20190122-03_FTMSms2EThcd	28.959	5093	193	41.2	8.2e-09	60309
userPPARg22	PPARg2recomb	PPARg2	60.5	1497.69	499.902	3	-0.5	K	LIYDRCDLNCR	I	LIYDRC(Carbamidomethyl)DLNC(Carbamidomethyl)R		1	Z20190122-03_FTMSms2EThcd	17.939	3042	195	32.7	1.5e-07	60309
userPPARg23	PPARg2recomb	PPARg2	60.5	837.335	419.171	2	1.4	R	CDLNCR	I	C(Carbamidomethyl)DLNC(Carbamidomethyl)R		0	Z20190122-03_FTMSms2EThcd	3.864	572	200	23.4	1.5e-06	60309
userPPARg24	PPARg2recomb	PPARg2	60.5	1747.87	583.296	3	-0.12	R	FQKCLAVGMSHNAIR	F	FQKC(Carbamidomethyl)LAVGM(Oxidation)SHNAIR	Oxidation@227	1	Z20190122-03_FTMSms2EThcd	16.408	2658	219	40.3	1.2e-10	60309
userPPARg25	PPARg2recomb	PPARg2	60.5	1344.65	448.888	3	-1	K	CLAVGMSHNAIR	F	C(Carbamidomethyl)LAVGM(Oxidation)SHNAIR	Oxidation@227	0	Z20190122-03_FTMSms2EThcd	19.595	3348	222	43.1	1.8e-10	60309
userPPARg26	PPARg2recomb	PPARg2	60.5	1328.66	443.557	3	-0.029	K	CLAVGMSHNAIR	F	C(Carbamidomethyl)LAVGMSHNAIR		0	Z20190122-03_FTMSms2EThcd	17.944	3043	222	54.3	4.6e-12	60309
userPPARg27	PPARg2recomb	PPARg2	60.5	2199.12	733.711	3	1.8	K	LLAEISSDIDQLNPESADLR	A	LLAEISSDIDQLNPESADLR		0	Z20190122-03_FTMSms2EThcd	60.38	10625	245	67	1e-12	60309
userPPARg28	PPARg2recomb	PPARg2	60.5	1421.78	474.598	3	-0.13	R	ALAKHLYDSYIK	S	ALAKHLYDSYIK		1	Z20190122-03_FTMSms2EThcd	26.728	4679	265	55.5	2.1e-07	60309
userPPARg29	PPARg2recomb	PPARg2	60.5	2454.09	818.701	3	0.33	K	TTDKSPFVIYDMNSLMMGEDK	I	TTDKSPFVIYDM(Oxidation)NSLM(Oxidation)MGEDK	Oxidation@304=69;Oxidation@308=7	1	Z20190122-03_FTMSms2EThcd	44.986	7981	293	49.1	2.8e-16	60309
userPPARg30	PPARg2recomb	PPARg2	60.5	2695.27	674.573	4	1.6	K	TTDKSPFVIYDMNSLMMGEDKIK	F	TTDKSPFVIYDM(Oxidation)NSLM(Oxidation)MGEDKIK	Oxidation@304=36;Oxidation@308=7	2	Z20190122-03_FTMSms2EThcd	43.674	7731	293	68.1	8.8e-14	60309
userPPARg31	PPARg2recomb	PPARg2	60.5	2454.09	818.7	3	-0.28	K	TTDKSPFVIYDMNSLMMGEDK	I	TTDKSPFVIYDM(Oxidation)NSLMM(Oxidation)GEDK	Oxidation@304=58;Oxidation@309=12	1	Z20190122-03_FTMSms2EThcd	45.503	8070	293	70.1	3.1e-16	60309
userPPARg32	PPARg2recomb	PPARg2	60.5	2454.09	818.702	3	1.1	K	TTDKSPFVIYDMNSLMMGEDK	I	TTDKSPFVIYDMNSLM(Oxidation)M(Oxidation)GEDK	Oxidation@308=34;Oxidation@309=44	1	Z20190122-03_FTMSms2EThcd	47.829	8498	293	34	1.8e-10	60309
userPPARg33	PPARg2recomb	PPARg2	60.5	2695.27	674.572	4	0.53	K	TTDKSPFVIYDMNSLMMGEDKIK	F	TTDKSPFVIYDMNSLM(Oxidation)M(Oxidation)GEDKIK	Oxidation@308=18;Oxidation@309=26	2	Z20190122-03_FTMSms2EThcd	46.342	8226	293	37.2	8.8e-10	60309
userPPARg34	PPARg2recomb	PPARg2	60.5	2250.05	750.687	3	-0.64	K	SPFVIYDMNSLMMGEDKIK	F	SPFVIYDM(Oxidation)NSLM(Oxidation)MGEDKIK	Oxidation@304=8;Oxidation@308|309	1	Z20190122-03_FTMSms2EThcd	47.144	8368	297	16.8	5.8e-07	60309
userPPARg35	PPARg2recomb	PPARg2	60.5	2250.05	750.688	3	0.16	K	SPFVIYDMNSLMMGEDKIK	F	SPFVIYDM(Oxidation)NSLMM(Oxidation)GEDKIK	Oxidation@304=18;Oxidation@309=9	1	Z20190122-03_FTMSms2EThcd	48.203	8567	297	32.1	6.6e-09	60309
userPPARg36	PPARg2recomb	PPARg2	60.5	2008.87	670.296	3	1.5	K	SPFVIYDMNSLMMGEDK	I	SPFVIYDMNSLM(Oxidation)M(Oxidation)GEDK	Oxidation@308=31;Oxidation@309=42	0	Z20190122-03_FTMSms2EThcd	53.311	9453	297	46.5	8.5e-10	60309
userPPARg37	PPARg2recomb	PPARg2	60.5	2250.05	750.689	3	1.2	K	SPFVIYDMNSLMMGEDKIK	F	SPFVIYDMNSLM(Oxidation)M(Oxidation)GEDKIK	Oxidation@308=12;Oxidation@309=20	1	Z20190122-03_FTMSms2EThcd	50.298	8926	297	40.8	4e-10	60309
userPPARg38	PPARg2recomb	PPARg2	60.5	1455.79	485.937	3	-0.34	K	FKHITPLQEQSK	E	FKHITPLQEQSK		1	Z20190122-03_FTMSms2EThcd	14.979	2349	316	47.7	5.8e-10	60309
userPPARg39	PPARg2recomb	PPARg2	60.5	1180.63	394.216	3	0.16	K	HITPLQEQSK	E	HITPLQEQSK		0	Z20190122-03_FTMSms2EThcd	14.022	2168	318	26.8	7.7e-07	60309
userPPARg40	PPARg2recomb	PPARg2	60.5	1748.97	583.66	3	0.051	K	HITPLQEQSKEVAIR	I	HITPLQEQSKEVAIR		1	Z20190122-03_FTMSms2EThcd	17.2	2849	318	52.7	1.5e-09	60309
userPPARg41	PPARg2recomb	PPARg2	60.5	1055.51	528.259	2	0.58	R	IFQGCQFR	S	IFQGC(Carbamidomethyl)QFR		0	Z20190122-03_FTMSms2EThcd	27.437	4799	333	37.3	1.6e-05	60309
userPPARg42	PPARg2recomb	PPARg2	60.5	1466.74	733.873	2	1.1	R	SVEAVQEITEYAK	N	SVEAVQEITEYAK		0	Z20190122-03_FTMSms2EThcd	41.093	7251	341	69.2	4.3e-08	60309
userPPARg43	PPARg2recomb	PPARg2	60.5	2027.12	676.377	3	0.088	K	NIPGFINLDLNDQVTLLK	Y	NIPGFINLDLNDQVTLLK		0	Z20190122-03_FTMSms2EThcd	69.049	12032	354	35.9	8.4e-07	60309
userPPARg44	PPARg2recomb	PPARg2	60.5	2015	672.34	3	3.4	K	YGVHEIIYTMLASLMNK	D	YGVHEIIYTM(Oxidation)LASLM(Oxidation)NK	Oxidation@381;Oxidation@386	0	Z20190122-03_FTMSms2EThcd	50.396	8944	372	33.2	3.5e-08	60309
userPPARg45	PPARg2recomb	PPARg2	60.5	1728.81	576.942	3	0.84	K	DGVLISEGQGFMTR	E	DGVLIS(HexNAc)EGQGFM(Oxidation)TR	HexNAc@394=61;Oxidation@400	0	Z20190122-03_FTMSms2EThcd	38.14	6725	389	37.2	3.3e-08	60309
userPPARg46	PPARg2recomb	PPARg2	60.5	1525.73	763.37	2	0.53	K	DGVLISEGQGFMTR	E	DGVLISEGQGFM(Oxidation)TR	Oxidation@400	0	Z20190122-03_FTMSms2EThcd	42.109	7440	389	46.3	6.2e-12	60309
userPPARg47	PPARg2recomb	PPARg2	60.5	1509.74	503.917	3	-0.1	K	DGVLISEGQGFMTR	E	DGVLISEGQGFMTR		0	Z20190122-03_FTMSms2EThcd	47.445	8424	389	54.9	2.8e-10	60309
userPPARg48	PPARg2recomb	PPARg2	60.5	1567.79	523.269	3	-0.43	K	SLRKPFGDFMEPK	F	SLRKPFGDFM(Oxidation)EPK	Oxidation@416	1	Z20190122-03_FTMSms2EThcd	24.368	4259	407	35	2.1e-11	60309
userPPARg49	PPARg2recomb	PPARg2	60.5	1211.58	404.53	3	-0.64	R	KPFGDFMEPK	F	KPFGDFM(Oxidation)EPK	Oxidation@416	0	Z20190122-03_FTMSms2EThcd	20.703	3557	410	28.9	2.7e-08	60309
userPPARg50	PPARg2recomb	PPARg2	60.5	1195.58	399.199	3	-0.05	R	KPFGDFMEPK	F	KPFGDFMEPK		0	Z20190122-03_FTMSms2EThcd	29.992	5285	410	30.7	2.3e-06	60309
userPPARg51	PPARg2recomb	PPARg2	60.5	1450.67	484.229	3	-0.33	K	LNHPESSQLFAK	V	LNHPESS(Phospho)QLFAK	Phospho@481=7	0	Z20190122-03_FTMSms2EThcd	26.375	4619	475	30.8	1.1e-07	60309
userPPARg52	PPARg2recomb	PPARg2	60.5	1370.71	457.574	3	-0.032	K	LNHPESSQLFAK	V	LNHPESSQLFAK		0	Z20190122-03_FTMSms2EThcd	27.039	4733	475	36.8	2.4e-08	60309
userPPARg53	PPARg2recomb	PPARg2	60.5	1839.01	460.508	4	-1.6	K	LNHPESSQLFAKVLQK	M	LNHPESSQLFAKVLQK		1	Z20190122-03_FTMSms2EThcd	34.326	6056	475	21.2	1.5e-05	60309
userPPARg54	PPARg2recomb	PPARg2	60.5	1639.95	547.323	3	0.51	R	QIVTEHVQLLHVIK	K	Q(Gln->pyro-Glu)IVTEHVQLLHVIK	Gln->pyro-Glu@496	0	Z20190122-03_FTMSms2EThcd	35.477	6253	496	47.9	9.9e-09	60309
userPPARg55	PPARg2recomb	PPARg2	60.5	1768.05	590.022	3	1.5	R	QIVTEHVQLLHVIKK	T	Q(Gln->pyro-Glu)IVTEHVQLLHVIKK	Gln->pyro-Glu@496	1	Z20190122-03_FTMSms2EThcd	38.991	6870	496	54.8	2.1e-11	60309
userPPARg56	PPARg2recomb	PPARg2	60.5	1656.98	552.998	3	0.12	R	QIVTEHVQLLHVIK	K	QIVTEHVQLLHVIK		0	Z20190122-03_FTMSms2EThcd	35.398	6238	496	63.9	2.1e-09	60309
userPPARg57	PPARg2recomb	PPARg2	60.5	1785.07	447.024	4	-0.42	R	QIVTEHVQLLHVIKK	T	QIVTEHVQLLHVIKK		1	Z20190122-03_FTMSms2EThcd	29.778	5241	496	71	1.3e-08	60309
userPPARg58	PPARg2recomb	PPARg2	60.5	2265.14	567.039	4	1.4	K	KTETDMSLHPLLQEIYK	D	KT(HexNAc)ETDM(Oxidation)SLHPLLQEIYK	HexNAc@511=14;Oxidation@515	1	Z20190122-03_FTMSms2EThcd	37.82	6670	510	49	1.3e-09	60309
userPPARg59	PPARg2recomb	PPARg2	60.5	2062.05	688.023	3	1.1	K	KTETDMSLHPLLQEIYK	D	KTETDM(Oxidation)SLHPLLQEIYK	Oxidation@515	1	Z20190122-03_FTMSms2EThcd	39.249	6915	510	59.6	2.9e-11	60309
userPPARg60	PPARg2recomb	PPARg2	60.5	2453.23	614.062	4	0.54	K	KTETDMSLHPLLQEIYKDLY	-	KTETDM(Oxidation)SLHPLLQEIYKDLY	Oxidation@515	2	Z20190122-03_FTMSms2EThcd	58.017	10243	510	71.8	4.5e-16	60309
userPPARg61	PPARg2recomb	PPARg2	60.5	2046.06	682.692	3	2	K	KTETDMSLHPLLQEIYK	D	KTETDMSLHPLLQEIYK		1	Z20190122-03_FTMSms2EThcd	43.738	7743	510	31.6	5.3e-08	60309
userPPARg62	PPARg2recomb	PPARg2	60.5	1933.96	645.324	3	-0.37	K	TETDMSLHPLLQEIYK	D	TETDM(Oxidation)SLHPLLQEIYK	Oxidation@515	0	Z20190122-03_FTMSms2EThcd	45.41	8052	511	60.1	3.5e-11	60309
userPPARg63	PPARg2recomb	PPARg2	60.5	1917.97	639.993	3	1.4	K	TETDMSLHPLLQEIYK	D	TETDMSLHPLLQEIYK		0	Z20190122-03_FTMSms2EThcd	50.467	8958	511	36.7	3.7e-10	60309
P37231	PPARG	Peroxisome proliferator-activated receptor gamma	50.9	2630.29	877.435	3	1	K	LQEYQSAIKVEPASPPYYSEK	T	LQEYQS(HexNAc)AIKVEPASPPYYSEK	HexNAc@104=62	1	Z20190122-03_FTMSms2EThcd	37.162	6557	99	47.2	1e-09	57620.7
P37231	PPARG	Peroxisome proliferator-activated receptor gamma	50.9	2507.17	836.396	3	0.31	K	LQEYQSAIKVEPASPPYYSEK	T	LQEYQSAIKVEPAS(Phospho)PPYYSEK	Phospho@112=16	1	Z20190122-03_FTMSms2EThcd	42.903	7589	99	65.2	1.3e-12	57620.7
P37231	PPARG	Peroxisome proliferator-activated receptor gamma	50.9	2427.21	809.741	3	0.25	K	LQEYQSAIKVEPASPPYYSEK	T	LQEYQSAIKVEPASPPYYSEK		1	Z20190122-03_FTMSms2EThcd	38.841	6844	99	69	5.7e-13	57620.7
P37231	PPARG	Peroxisome proliferator-activated receptor gamma	50.9	1446.62	482.878	3	-0.42	K	VEPASPPYYSEK	T	VEPAS(Phospho)PPYYSEK	Phospho@112=25	0	Z20190122-03_FTMSms2EThcd	29.873	5260	108	39.3	9e-10	57620.7
P37231	PPARG	Peroxisome proliferator-activated receptor gamma	50.9	1366.65	456.222	3	-0.57	K	VEPASPPYYSEK	T	VEPASPPYYSEK		0	Z20190122-03_FTMSms2EThcd	20.108	3446	108	46.5	1.7e-07	57620.7
P37231	PPARG	Peroxisome proliferator-activated receptor gamma	50.9	2533.18	634.051	4	0.47	K	TQLYNKPHEEPSNSLMAIECR	V	TQLYNKPHEEPSNSLM(Oxidation)AIEC(Carbamidomethyl)R	Oxidation@135	0	Z20190122-03_FTMSms2EThcd	28.767	5057	120	68	1.7e-12	57620.7
P37231	PPARG	Peroxisome proliferator-activated receptor gamma	50.9	2517.19	630.053	4	1.9	K	TQLYNKPHEEPSNSLMAIECR	V	TQLYNKPHEEPSNSLMAIEC(Carbamidomethyl)R		0	Z20190122-03_FTMSms2EThcd	32.378	5723	120	60.5	3.1e-11	57620.7
P37231	PPARG	Peroxisome proliferator-activated receptor gamma	50.9	1679.71	560.574	3	0.55	K	ASGFHYGVHACEGCK	G	ASGFHYGVHAC(Carbamidomethyl)EGC(Carbamidomethyl)K		0	Z20190122-03_FTMSms2EThcd	16.787	2742	146	60.7	1.7e-14	57620.7
P37231	PPARG	Peroxisome proliferator-activated receptor gamma	50.9	1290.79	430.935	3	0.012	R	TIRLKLIYDR	C	TIRLKLIYDR		2	Z20190122-03_FTMSms2EThcd	30.159	5316	166	39.3	6.2e-13	57620.7
P37231	PPARG	Peroxisome proliferator-activated receptor gamma	50.9	1738.87	435.474	4	-0.32	R	LKLIYDRCDLNCR	I	LKLIYDRC(Carbamidomethyl)DLNC(Carbamidomethyl)R		2	Z20190122-03_FTMSms2EThcd	28.959	5093	169	41.2	8.2e-09	57620.7
P37231	PPARG	Peroxisome proliferator-activated receptor gamma	50.9	1497.69	499.902	3	-0.5	K	LIYDRCDLNCR	I	LIYDRC(Carbamidomethyl)DLNC(Carbamidomethyl)R		1	Z20190122-03_FTMSms2EThcd	17.939	3042	171	32.7	1.5e-07	57620.7
P37231	PPARG	Peroxisome proliferator-activated receptor gamma	50.9	837.335	419.171	2	1.4	R	CDLNCR	I	C(Carbamidomethyl)DLNC(Carbamidomethyl)R		0	Z20190122-03_FTMSms2EThcd	3.864	572	176	23.4	1.5e-06	57620.7
P37231	PPARG	Peroxisome proliferator-activated receptor gamma	50.9	1747.87	583.296	3	-0.12	R	FQKCLAVGMSHNAIR	F	FQKC(Carbamidomethyl)LAVGM(Oxidation)SHNAIR	Oxidation@203	1	Z20190122-03_FTMSms2EThcd	16.408	2658	195	40.3	1.2e-10	57620.7
P37231	PPARG	Peroxisome proliferator-activated receptor gamma	50.9	1344.65	448.888	3	-1	K	CLAVGMSHNAIR	F	C(Carbamidomethyl)LAVGM(Oxidation)SHNAIR	Oxidation@203	0	Z20190122-03_FTMSms2EThcd	19.595	3348	198	43.1	1.8e-10	57620.7
P37231	PPARG	Peroxisome proliferator-activated receptor gamma	50.9	1328.66	443.557	3	-0.029	K	CLAVGMSHNAIR	F	C(Carbamidomethyl)LAVGMSHNAIR		0	Z20190122-03_FTMSms2EThcd	17.944	3043	198	54.3	4.6e-12	57620.7
P37231	PPARG	Peroxisome proliferator-activated receptor gamma	50.9	2199.12	733.711	3	1.8	K	LLAEISSDIDQLNPESADLR	A	LLAEISSDIDQLNPESADLR		0	Z20190122-03_FTMSms2EThcd	60.38	10625	221	67	1e-12	57620.7
P37231	PPARG	Peroxisome proliferator-activated receptor gamma	50.9	1421.78	474.598	3	-0.13	R	ALAKHLYDSYIK	S	ALAKHLYDSYIK		1	Z20190122-03_FTMSms2EThcd	26.728	4679	241	55.5	2.1e-07	57620.7
P37231	PPARG	Peroxisome proliferator-activated receptor gamma	50.9	2454.09	818.701	3	0.33	K	TTDKSPFVIYDMNSLMMGEDK	I	TTDKSPFVIYDM(Oxidation)NSLM(Oxidation)MGEDK	Oxidation@280=69;Oxidation@284=7	1	Z20190122-03_FTMSms2EThcd	44.986	7981	269	49.1	2.8e-16	57620.7
P37231	PPARG	Peroxisome proliferator-activated receptor gamma	50.9	2695.27	674.573	4	1.6	K	TTDKSPFVIYDMNSLMMGEDKIK	F	TTDKSPFVIYDM(Oxidation)NSLM(Oxidation)MGEDKIK	Oxidation@280=36;Oxidation@284=7	2	Z20190122-03_FTMSms2EThcd	43.674	7731	269	68.1	8.8e-14	57620.7
P37231	PPARG	Peroxisome proliferator-activated receptor gamma	50.9	2454.09	818.7	3	-0.28	K	TTDKSPFVIYDMNSLMMGEDK	I	TTDKSPFVIYDM(Oxidation)NSLMM(Oxidation)GEDK	Oxidation@280=58;Oxidation@285=12	1	Z20190122-03_FTMSms2EThcd	45.503	8070	269	70.1	3.1e-16	57620.7
P37231	PPARG	Peroxisome proliferator-activated receptor gamma	50.9	2454.09	818.702	3	1.1	K	TTDKSPFVIYDMNSLMMGEDK	I	TTDKSPFVIYDMNSLM(Oxidation)M(Oxidation)GEDK	Oxidation@284=34;Oxidation@285=44	1	Z20190122-03_FTMSms2EThcd	47.829	8498	269	34	1.8e-10	57620.7
P37231	PPARG	Peroxisome proliferator-activated receptor gamma	50.9	2695.27	674.572	4	0.53	K	TTDKSPFVIYDMNSLMMGEDKIK	F	TTDKSPFVIYDMNSLM(Oxidation)M(Oxidation)GEDKIK	Oxidation@284=18;Oxidation@285=26	2	Z20190122-03_FTMSms2EThcd	46.342	8226	269	37.2	8.8e-10	57620.7
P37231	PPARG	Peroxisome proliferator-activated receptor gamma	50.9	2250.05	750.687	3	-0.64	K	SPFVIYDMNSLMMGEDKIK	F	SPFVIYDM(Oxidation)NSLM(Oxidation)MGEDKIK	Oxidation@280=8;Oxidation@284|285	1	Z20190122-03_FTMSms2EThcd	47.144	8368	273	16.8	5.8e-07	57620.7
P37231	PPARG	Peroxisome proliferator-activated receptor gamma	50.9	2250.05	750.688	3	0.16	K	SPFVIYDMNSLMMGEDKIK	F	SPFVIYDM(Oxidation)NSLMM(Oxidation)GEDKIK	Oxidation@280=18;Oxidation@285=9	1	Z20190122-03_FTMSms2EThcd	48.203	8567	273	32.1	6.6e-09	57620.7
P37231	PPARG	Peroxisome proliferator-activated receptor gamma	50.9	2008.87	670.296	3	1.5	K	SPFVIYDMNSLMMGEDK	I	SPFVIYDMNSLM(Oxidation)M(Oxidation)GEDK	Oxidation@284=31;Oxidation@285=42	0	Z20190122-03_FTMSms2EThcd	53.311	9453	273	46.5	8.5e-10	57620.7
P37231	PPARG	Peroxisome proliferator-activated receptor gamma	50.9	2250.05	750.689	3	1.2	K	SPFVIYDMNSLMMGEDKIK	F	SPFVIYDMNSLM(Oxidation)M(Oxidation)GEDKIK	Oxidation@284=12;Oxidation@285=20	1	Z20190122-03_FTMSms2EThcd	50.298	8926	273	40.8	4e-10	57620.7
P37231	PPARG	Peroxisome proliferator-activated receptor gamma	50.9	1455.79	485.937	3	-0.34	K	FKHITPLQEQSK	E	FKHITPLQEQSK		1	Z20190122-03_FTMSms2EThcd	14.979	2349	292	47.7	5.8e-10	57620.7
P37231	PPARG	Peroxisome proliferator-activated receptor gamma	50.9	1180.63	394.216	3	0.16	K	HITPLQEQSK	E	HITPLQEQSK		0	Z20190122-03_FTMSms2EThcd	14.022	2168	294	26.8	7.7e-07	57620.7
P37231	PPARG	Peroxisome proliferator-activated receptor gamma	50.9	1748.97	583.66	3	0.051	K	HITPLQEQSKEVAIR	I	HITPLQEQSKEVAIR		1	Z20190122-03_FTMSms2EThcd	17.2	2849	294	52.7	1.5e-09	57620.7
P37231	PPARG	Peroxisome proliferator-activated receptor gamma	50.9	1055.51	528.259	2	0.58	R	IFQGCQFR	S	IFQGC(Carbamidomethyl)QFR		0	Z20190122-03_FTMSms2EThcd	27.437	4799	309	37.3	1.6e-05	57620.7
P37231	PPARG	Peroxisome proliferator-activated receptor gamma	50.9	1466.74	733.873	2	1.1	R	SVEAVQEITEYAK	S	SVEAVQEITEYAK		0	Z20190122-03_FTMSms2EThcd	41.093	7251	317	69.2	4.3e-08	57620.7
P37231	PPARG	Peroxisome proliferator-activated receptor gamma	50.9	2015	672.34	3	3.4	K	YGVHEIIYTMLASLMNK	D	YGVHEIIYTM(Oxidation)LASLM(Oxidation)NK	Oxidation@357;Oxidation@362	0	Z20190122-03_FTMSms2EThcd	50.396	8944	348	33.2	3.5e-08	57620.7
P37231	PPARG	Peroxisome proliferator-activated receptor gamma	50.9	1728.81	576.942	3	0.84	K	DGVLISEGQGFMTR	E	DGVLIS(HexNAc)EGQGFM(Oxidation)TR	HexNAc@370=61;Oxidation@376	0	Z20190122-03_FTMSms2EThcd	38.14	6725	365	37.2	3.3e-08	57620.7
P37231	PPARG	Peroxisome proliferator-activated receptor gamma	50.9	1525.73	763.37	2	0.53	K	DGVLISEGQGFMTR	E	DGVLISEGQGFM(Oxidation)TR	Oxidation@376	0	Z20190122-03_FTMSms2EThcd	42.109	7440	365	46.3	6.2e-12	57620.7
P37231	PPARG	Peroxisome proliferator-activated receptor gamma	50.9	1509.74	503.917	3	-0.1	K	DGVLISEGQGFMTR	E	DGVLISEGQGFMTR		0	Z20190122-03_FTMSms2EThcd	47.445	8424	365	54.9	2.8e-10	57620.7
P37231	PPARG	Peroxisome proliferator-activated receptor gamma	50.9	1567.79	523.269	3	-0.43	K	SLRKPFGDFMEPK	F	SLRKPFGDFM(Oxidation)EPK	Oxidation@392	1	Z20190122-03_FTMSms2EThcd	24.368	4259	383	35	2.1e-11	57620.7
P37231	PPARG	Peroxisome proliferator-activated receptor gamma	50.9	1211.58	404.53	3	-0.64	R	KPFGDFMEPK	F	KPFGDFM(Oxidation)EPK	Oxidation@392	0	Z20190122-03_FTMSms2EThcd	20.703	3557	386	28.9	2.7e-08	57620.7
P37231	PPARG	Peroxisome proliferator-activated receptor gamma	50.9	1195.58	399.199	3	-0.05	R	KPFGDFMEPK	F	KPFGDFMEPK		0	Z20190122-03_FTMSms2EThcd	29.992	5285	386	30.7	2.3e-06	57620.7
P37231	PPARG	Peroxisome proliferator-activated receptor gamma	50.9	1450.67	484.229	3	-0.33	K	LNHPESSQLFAK	L	LNHPESS(Phospho)QLFAK	Phospho@457=7	0	Z20190122-03_FTMSms2EThcd	26.375	4619	451	30.8	1.1e-07	57620.7
P37231	PPARG	Peroxisome proliferator-activated receptor gamma	50.9	1370.71	457.574	3	-0.032	K	LNHPESSQLFAK	L	LNHPESSQLFAK		0	Z20190122-03_FTMSms2EThcd	27.039	4733	451	36.8	2.4e-08	57620.7
P37231	PPARG	Peroxisome proliferator-activated receptor gamma	50.9	2265.14	567.039	4	1.4	K	KTETDMSLHPLLQEIYK	D	KT(HexNAc)ETDM(Oxidation)SLHPLLQEIYK	HexNAc@487=14;Oxidation@491	1	Z20190122-03_FTMSms2EThcd	37.82	6670	486	49	1.3e-09	57620.7
P37231	PPARG	Peroxisome proliferator-activated receptor gamma	50.9	2062.05	688.023	3	1.1	K	KTETDMSLHPLLQEIYK	D	KTETDM(Oxidation)SLHPLLQEIYK	Oxidation@491	1	Z20190122-03_FTMSms2EThcd	39.249	6915	486	59.6	2.9e-11	57620.7
P37231	PPARG	Peroxisome proliferator-activated receptor gamma	50.9	2453.23	614.062	4	0.54	K	KTETDMSLHPLLQEIYKDLY	-	KTETDM(Oxidation)SLHPLLQEIYKDLY	Oxidation@491	2	Z20190122-03_FTMSms2EThcd	58.017	10243	486	71.8	4.5e-16	57620.7
P37231	PPARG	Peroxisome proliferator-activated receptor gamma	50.9	2046.06	682.692	3	2	K	KTETDMSLHPLLQEIYK	D	KTETDMSLHPLLQEIYK		1	Z20190122-03_FTMSms2EThcd	43.738	7743	486	31.6	5.3e-08	57620.7
P37231	PPARG	Peroxisome proliferator-activated receptor gamma	50.9	1933.96	645.324	3	-0.37	K	TETDMSLHPLLQEIYK	D	TETDM(Oxidation)SLHPLLQEIYK	Oxidation@491	0	Z20190122-03_FTMSms2EThcd	45.41	8052	487	60.1	3.5e-11	57620.7
P37231	PPARG	Peroxisome proliferator-activated receptor gamma	50.9	1917.97	639.993	3	1.4	K	TETDMSLHPLLQEIYK	D	TETDMSLHPLLQEIYK		0	Z20190122-03_FTMSms2EThcd	50.467	8958	487	36.7	3.7e-10	57620.7
O15294	OGT	UDP-N-acetylglucosamine--peptide N-acetylglucosaminyltransferase 110 kDa subunit	23.6	1994.94	499.492	4	5.5	-	MASSVGNVADSTEPTKR	M	Acetyl-MAS(HexNAc)SVGNVADSTEPTKR	Acetyl@1;HexNAc@3=9	1	Z20190122-03_FTMSms2EThcd	9.172	1380	1	36.9	4.5e-06	116926
O15294	OGT	UDP-N-acetylglucosamine--peptide N-acetylglucosaminyltransferase 110 kDa subunit	23.6	1385.6	693.302	2	0.38	R	EYQAGDFEAAER	H	EYQAGDFEAAER		0	Z20190122-03_FTMSms2EThcd	26.018	4554	31	55.9	5.6e-10	116926
O15294	OGT	UDP-N-acetylglucosamine--peptide N-acetylglucosaminyltransferase 110 kDa subunit	23.6	1074.59	358.87	3	0.025	R	SAHFSTLAIK	Q	SAHFSTLAIK		0	Z20190122-03_FTMSms2EThcd	17.598	2961	74	34.2	2.6e-06	116926
O15294	OGT	UDP-N-acetylglucosamine--peptide N-acetylglucosaminyltransferase 110 kDa subunit	23.6	1628.81	407.959	4	0.14	K	ERGQLQEAIEHYR	H	ERGQLQEAIEHYR		1	Z20190122-03_FTMSms2EThcd	24.482	4278	101	49.8	2e-08	116926
O15294	OGT	UDP-N-acetylglucosamine--peptide N-acetylglucosaminyltransferase 110 kDa subunit	23.6	1343.67	448.562	3	-0.22	R	GQLQEAIEHYR	H	GQLQEAIEHYR		0	Z20190122-03_FTMSms2EThcd	30.43	5374	103	48.8	1.6e-07	116926
O15294	OGT	UDP-N-acetylglucosamine--peptide N-acetylglucosaminyltransferase 110 kDa subunit	23.6	1912.87	638.295	3	0.27	K	EKGSVAEAEDCYNTALR	L	EKGSVAEAEDC(Carbamidomethyl)YNTALR		1	Z20190122-03_FTMSms2EThcd	27.79	4862	305	73.1	1.3e-13	116926
O15294	OGT	UDP-N-acetylglucosamine--peptide N-acetylglucosaminyltransferase 110 kDa subunit	23.6	1655.73	552.583	3	0.35	K	GSVAEAEDCYNTALR	L	GSVAEAEDC(Carbamidomethyl)YNTALR		0	Z20190122-03_FTMSms2EThcd	31.711	5606	307	62.1	1.6e-13	116926
O15294	OGT	UDP-N-acetylglucosamine--peptide N-acetylglucosaminyltransferase 110 kDa subunit	23.6	1780.9	594.305	3	0.0018	R	LCPTHADSLNNLANIK	R	LC(Carbamidomethyl)PTHADSLNNLANIK		0	Z20190122-03_FTMSms2EThcd	33.822	5972	322	69.1	5.7e-11	116926
O15294	OGT	UDP-N-acetylglucosamine--peptide N-acetylglucosaminyltransferase 110 kDa subunit	23.6	1937	646.338	3	-0.93	R	LCPTHADSLNNLANIKR	E	LC(Carbamidomethyl)PTHADSLNNLANIKR		1	Z20190122-03_FTMSms2EThcd	28.688	5041	322	58.5	4.2e-11	116926
O15294	OGT	UDP-N-acetylglucosamine--peptide N-acetylglucosaminyltransferase 110 kDa subunit	23.6	1148.58	383.53	3	-0.7	K	LQEALMHYK	E	LQEALM(Oxidation)HYK	Oxidation@382	0	Z20190122-03_FTMSms2EThcd	15.175	2391	377	44.2	1.3e-06	116926
O15294	OGT	UDP-N-acetylglucosamine--peptide N-acetylglucosaminyltransferase 110 kDa subunit	23.6	1132.58	378.199	3	0.18	K	LQEALMHYK	E	LQEALMHYK		0	Z20190122-03_FTMSms2EThcd	17.323	2887	377	36.2	3.5e-07	116926
O15294	OGT	UDP-N-acetylglucosamine--peptide N-acetylglucosaminyltransferase 110 kDa subunit	23.6	1845.87	615.961	3	0.17	R	ISPTFADAYSNMGNTLK	E	ISPTFADAYSNM(Oxidation)GNTLK	Oxidation@401	0	Z20190122-03_FTMSms2EThcd	38.846	6845	390	69.4	4.4e-09	116926
O15294	OGT	UDP-N-acetylglucosamine--peptide N-acetylglucosaminyltransferase 110 kDa subunit	23.6	1714.75	857.88	2	-0.0041	K	EMQDVQGALQCYTR	A	EM(Oxidation)QDVQGALQC(Carbamidomethyl)YTR	Oxidation@408	0	Z20190122-03_FTMSms2EThcd	33.68	5948	407	50.8	3.2e-10	116926
O15294	OGT	UDP-N-acetylglucosamine--peptide N-acetylglucosaminyltransferase 110 kDa subunit	23.6	1698.76	849.881	2	-1.2	K	EMQDVQGALQCYTR	A	EMQDVQGALQC(Carbamidomethyl)YTR		0	Z20190122-03_FTMSms2EThcd	39.6	6976	407	25.7	1.3e-05	116926
O15294	OGT	UDP-N-acetylglucosamine--peptide N-acetylglucosaminyltransferase 110 kDa subunit	23.6	2118.11	530.283	4	0.33	R	AIQINPAFADAHSNLASIHK	D	AIQINPAFADAHSNLASIHK		0	Z20190122-03_FTMSms2EThcd	38.061	6712	421	76	1.8e-09	116926
O15294	OGT	UDP-N-acetylglucosamine--peptide N-acetylglucosaminyltransferase 110 kDa subunit	23.6	1392.68	696.841	2	-0.19	K	DSGNIPEAIASYR	T	DSGNIPEAIASYR		0	Z20190122-03_FTMSms2EThcd	41.578	7342	441	54.1	1.6e-08	116926
O15294	OGT	UDP-N-acetylglucosamine--peptide N-acetylglucosaminyltransferase 110 kDa subunit	23.6	1342.79	448.269	3	-0.071	K	KLVSIVADQLEK	N	KLVSIVADQLEK		1	Z20190122-03_FTMSms2EThcd	34.744	6125	488	40	8.9e-08	116926
O15294	OGT	UDP-N-acetylglucosamine--peptide N-acetylglucosaminyltransferase 110 kDa subunit	23.6	1214.7	607.853	2	0.2	K	LVSIVADQLEK	N	LVSIVADQLEK		0	Z20190122-03_FTMSms2EThcd	39.146	6898	489	47	9.9e-06	116926
O15294	OGT	UDP-N-acetylglucosamine--peptide N-acetylglucosaminyltransferase 110 kDa subunit	23.6	2228.12	446.43	5	0.54	R	LPSVHPHHSMLYPLSHGFR	K	LPSVHPHHSM(Oxidation)LYPLSHGFR	Oxidation@511	0	Z20190122-03_FTMSms2EThcd	27.704	4846	502	21.8	2.5e-05	116926
O15294	OGT	UDP-N-acetylglucosamine--peptide N-acetylglucosaminyltransferase 110 kDa subunit	23.6	1571.87	393.723	4	0.83	K	INVLHKPPYEHPK	D	INVLHKPPYEHPK		0	Z20190122-03_FTMSms2EThcd	15.289	2419	535	54.4	6.7e-07	116926
O15294	OGT	UDP-N-acetylglucosamine--peptide N-acetylglucosaminyltransferase 110 kDa subunit	23.6	929.469	465.238	2	0.041	K	AATGEEVPR	T	AATGEEVPR		0	Z20190122-03_FTMSms2EThcd	9.315	1405	817	26.3	1.1e-05	116926
O15294	OGT	UDP-N-acetylglucosamine--peptide N-acetylglucosaminyltransferase 110 kDa subunit	23.6	1621.91	406.232	4	0.57	R	IIFSPVAPKEEHVR	R	IIFSPVAPKEEHVR		1	Z20190122-03_FTMSms2EThcd	26.256	4597	900	64.6	5.2e-09	116926
O15294	OGT	UDP-N-acetylglucosamine--peptide N-acetylglucosaminyltransferase 110 kDa subunit	23.6	1364.68	455.565	3	-0.016	K	NRQEYEDIAVK	L	NRQEYEDIAVK		1	Z20190122-03_FTMSms2EThcd	16.761	2735	972	44.3	5.5e-08	116926
O15294	OGT	UDP-N-acetylglucosamine--peptide N-acetylglucosaminyltransferase 110 kDa subunit	23.6	1179.66	393.892	3	0.32	K	LGTDLEYLKK	V	LGTDLEYLKK		1	Z20190122-03_FTMSms2EThcd	27.308	4777	983	38.2	4.2e-06	116926
P04264	KRT1	Keratin, type II cytoskeletal 1	30.9	1657.79	829.401	2	1	R	SGGGFSSGSAGIINYQR	R	SGGGFSSGSAGIINYQR		0	Z20190122-03_FTMSms2EThcd	35.037	6176	13	35.3	5.1e-10	66039.2
P04264	KRT1	Keratin, type II cytoskeletal 1	30.9	1765.74	883.373	2	1.9	R	FSSCGGGGGSFGAGGGFGSR	S	FSSC(Carbamidomethyl)GGGGGSFGAGGGFGSR		0	Z20190122-03_FTMSms2EThcd	31.379	5548	46	64.4	8.9e-14	66039.2
P04264	KRT1	Keratin, type II cytoskeletal 1	30.9	1475.79	738.396	2	-0.099	R	FLEQQNQVLQTK	W	FLEQQNQVLQTK		0	Z20190122-03_FTMSms2EThcd	30.137	5312	200	57.7	1e-07	66039.2
P04264	KRT1	Keratin, type II cytoskeletal 1	30.9	2017.88	673.3	3	0.21	R	LDSELKNMQDMVEDYR	N	LDSELKNM(Oxidation)QDM(Oxidation)VEDYR	Oxidation@259;Oxidation@262	1	Z20190122-03_FTMSms2EThcd	27.274	4772	252	62	1.1e-13	66039.2
P04264	KRT1	Keratin, type II cytoskeletal 1	30.9	1332.52	666.764	2	0.33	K	NMQDMVEDYR	N	NM(Oxidation)QDM(Oxidation)VEDYR	Oxidation@259;Oxidation@262	0	Z20190122-03_FTMSms2EThcd	16.311	2638	258	44.9	9.7e-12	66039.2
P04264	KRT1	Keratin, type II cytoskeletal 1	30.9	1308.65	436.89	3	0.22	R	NKYEDEINKR	T	NKYEDEINKR		2	Z20190122-03_FTMSms2EThcd	9.478	1435	268	13.8	2.5e-05	66039.2
P04264	KRT1	Keratin, type II cytoskeletal 1	30.9	1265.64	633.322	2	-0.86	R	TNAENEFVTIK	K	TNAENEFVTIK		0	Z20190122-03_FTMSms2EThcd	30.491	5387	278	45.3	2.6e-07	66039.2
P04264	KRT1	Keratin, type II cytoskeletal 1	30.9	1393.73	465.249	3	-0.66	R	TNAENEFVTIKK	D	TNAENEFVTIKK		1	Z20190122-03_FTMSms2EThcd	17.431	2916	278	60.6	5e-09	66039.2
P04264	KRT1	Keratin, type II cytoskeletal 1	30.9	1015.44	508.224	2	1.6	K	DVDGAYMTK	V	DVDGAYM(Oxidation)TK	Oxidation@296	0	Z20190122-03_FTMSms2EThcd	10.228	1564	290	22.2	5.1e-08	66039.2
P04264	KRT1	Keratin, type II cytoskeletal 1	30.9	1340.67	447.562	3	0.53	K	SKAEAESLYQSK	Y	SKAEAESLYQSK		1	Z20190122-03_FTMSms2EThcd	9.893	1506	365	54.4	4.4e-09	66039.2
P04264	KRT1	Keratin, type II cytoskeletal 1	30.9	1179.6	590.304	2	0.76	K	YEELQITAGR	H	YEELQITAGR		0	Z20190122-03_FTMSms2EThcd	29.421	5175	377	49.6	6.7e-07	66039.2
P04264	KRT1	Keratin, type II cytoskeletal 1	30.9	1716.85	572.955	3	-0.22	K	QISNLQQSISDAEQR	G	QISNLQQSISDAEQR		0	Z20190122-03_FTMSms2EThcd	35.231	6209	418	44.8	3.3e-08	66039.2
P04264	KRT1	Keratin, type II cytoskeletal 1	30.9	1157.52	579.262	2	1.4	R	DYQELMNTK	L	DYQELM(Oxidation)NTK	Oxidation@469	0	Z20190122-03_FTMSms2EThcd	16.951	2782	464	27	9.6e-06	66039.2
P04264	KRT1	Keratin, type II cytoskeletal 1	30.9	2581.16	861.059	3	-0.061	R	MSGECAPNVSVSVSTSHTTISGGGSR	G	M(Oxidation)SGEC(Carbamidomethyl)APNVSVSVSTSHTTISGGGSR	Oxidation@493	0	Z20190122-03_FTMSms2EThcd	28.938	5089	493	66.6	8.8e-16	66039.2
P04264	KRT1	Keratin, type II cytoskeletal 1	30.9	2383.95	795.322	3	0.34	R	GGGGGGYGSGGSSYGSGGGSYGSGGGGGGGR	G	GGGGGGYGSGGSSYGSGGGSYGSGGGGGGGR		0	Z20190122-03_FTMSms2EThcd	16.512	2682	519	63.2	3.7e-22	66039.2
P35908	KRT2	Keratin, type II cytoskeletal 2 epidermal	13.6	1254.61	627.808	2	1.3	R	GFSSGSAVVSGGSR	R	GFSSGSAVVSGGSR		0	Z20190122-03_FTMSms2EThcd	17.096	2821	21	47.3	3.1e-09	65433.4
P35908	KRT2	Keratin, type II cytoskeletal 2 epidermal	13.6	1475.79	738.396	2	-0.099	R	FLEQQNQVLQTK	W	FLEQQNQVLQTK		0	Z20190122-03_FTMSms2EThcd	30.137	5312	198	57.7	1e-07	65433.4
P35908	KRT2	Keratin, type II cytoskeletal 2 epidermal	13.6	2272.04	758.019	3	1.4	R	TSQNSELNNMQDLVEDYKK	K	TSQNSELNNM(Oxidation)QDLVEDYKK	Oxidation@257	1	Z20190122-03_FTMSms2EThcd	27.777	4859	248	57.9	2.8e-13	65433.4
P35908	KRT2	Keratin, type II cytoskeletal 2 epidermal	13.6	1084.5	542.753	2	0.73	K	DVDNAYMIK	V	DVDNAYM(Oxidation)IK	Oxidation@294	0	Z20190122-03_FTMSms2EThcd	20.621	3542	288	31.8	9.2e-06	65433.4
P35908	KRT2	Keratin, type II cytoskeletal 2 epidermal	13.6	1391.68	464.565	3	-0.21	R	SKEEAEALYHSK	Y	SKEEAEALYHSK		1	Z20190122-03_FTMSms2EThcd	9.12	1371	363	41.5	6.8e-08	65433.4
P35908	KRT2	Keratin, type II cytoskeletal 2 epidermal	13.6	1193.62	597.312	2	0.21	K	YEELQVTVGR	H	YEELQVTVGR		0	Z20190122-03_FTMSms2EThcd	31.406	5553	375	45.6	1.1e-07	65433.4
P35908	KRT2	Keratin, type II cytoskeletal 2 epidermal	13.6	1343.75	448.59	3	1.4	K	EIKIEISELNR	V	EIKIEISELNR		1	Z20190122-03_FTMSms2EThcd	37.232	6568	391	23.6	1.2e-05	65433.4
P17987	TCP1	T-complex protein 1 subunit alpha	23.4	1532.81	766.909	2	0.4	R	SQNVMAAASIANIVK	S	SQNVM(Oxidation)AAASIANIVK	Oxidation@23	0	Z20190122-03_FTMSms2EThcd	39.587	6973	19	40.1	3.8e-07	60344.1
P17987	TCP1	T-complex protein 1 subunit alpha	23.4	972.535	486.771	2	-0.73	K	SSLGPVGLDK	M	SSLGPVGLDK		0	Z20190122-03_FTMSms2EThcd	26.167	4581	34	31	3e-06	60344.1
P17987	TCP1	T-complex protein 1 subunit alpha	23.4	1106.62	369.545	3	0.01	K	LLEVEHPAAK	V	LLEVEHPAAK		0	Z20190122-03_FTMSms2EThcd	16.294	2634	64	35.9	7.6e-06	60344.1
P17987	TCP1	T-complex protein 1 subunit alpha	23.4	1229.66	410.559	3	-0.28	K	IHPTSVISGYR	L	IHPTSVISGYR		0	Z20190122-03_FTMSms2EThcd	17.589	2958	112	34.2	6.7e-09	60344.1
P17987	TCP1	T-complex protein 1 subunit alpha	23.4	1213.61	607.307	2	1.9	K	YFVEAGAMAVR	R	YFVEAGAMAVR		0	Z20190122-03_FTMSms2EThcd	37.224	6567	299	41.9	2.4e-07	60344.1
P17987	TCP1	T-complex protein 1 subunit alpha	23.4	1506.53	753.769	2	0.62	R	GANDFMCDEMER	S	GANDFM(Oxidation)C(Carbamidomethyl)DEM(Oxidation)ER	Oxidation@384;Oxidation@388	0	Z20190122-03_FTMSms2EThcd	16.528	2685	379	33.4	1e-11	60344.1
P17987	TCP1	T-complex protein 1 subunit alpha	23.4	1141.6	381.206	3	-1	R	SLHDALCVVK	R	SLHDALC(Carbamidomethyl)VVK		0	Z20190122-03_FTMSms2EThcd	23.833	4159	391	29	6.3e-08	60344.1
P17987	TCP1	T-complex protein 1 subunit alpha	23.4	1147.61	574.309	2	0.46	R	EQLAIAEFAR	S	EQLAIAEFAR		0	Z20190122-03_FTMSms2EThcd	41.666	7359	434	45.8	3.3e-06	60344.1
P17987	TCP1	T-complex protein 1 subunit alpha	23.4	1411.67	471.229	3	-0.039	R	AFHNEAQVNPER	K	AFHNEAQVNPER		0	Z20190122-03_FTMSms2EThcd	10.181	1555	469	39.8	4.8e-10	60344.1
P17987	TCP1	T-complex protein 1 subunit alpha	23.4	1188.66	594.835	2	0.36	K	QAGVFEPTIVK	V	QAGVFEPTIVK		0	Z20190122-03_FTMSms2EThcd	35.27	6216	500	40.5	4.6e-07	60344.1
P17987	TCP1	T-complex protein 1 subunit alpha	23.4	1929.82	643.946	3	1.3	K	DDKHGSYEDAVHSGALND	-	DDKHGSYEDAVHSGALND		1	Z20190122-03_FTMSms2EThcd	17.35	2894	539	47.9	7.6e-11	60344.1
Q86X55	CARM1	Histone-arginine methyltransferase CARM1	14.5	1399.76	700.382	2	1.5	R	LLTIGDANGEIQR	H	LLTIGDANGEIQR		0	Z20190122-03_FTMSms2EThcd	36.786	6493	37	55	1.9e-05	65854.3
Q86X55	CARM1	Histone-arginine methyltransferase CARM1	14.5	1186.62	396.212	3	0.21	R	AILQNHTDFK	D	AILQNHTDFK		0	Z20190122-03_FTMSms2EThcd	16.982	2789	175	29.9	1.4e-06	65854.3
Q86X55	CARM1	Histone-arginine methyltransferase CARM1	14.5	1429.75	477.255	3	4.5	R	AILQNHTDFKDK	I	AILQNHTDFKDK		1	Z20190122-03_FTMSms2EThcd	15.405	2444	175	50.8	1.2e-06	65854.3
Q86X55	CARM1	Histone-arginine methyltransferase CARM1	14.5	2104.11	702.042	3	0.5	R	KIYAVEASTMAQHAEVLVK	S	KIYAVEASTM(Oxidation)AQHAEVLVK	Oxidation@218	1	Z20190122-03_FTMSms2EThcd	30.241	5332	209	56.2	2.4e-11	65854.3
Q86X55	CARM1	Histone-arginine methyltransferase CARM1	14.5	1976.02	659.344	3	0.56	K	IYAVEASTMAQHAEVLVK	S	IYAVEASTM(Oxidation)AQHAEVLVK	Oxidation@218	0	Z20190122-03_FTMSms2EThcd	34.831	6140	210	51.6	5.2e-09	65854.3
Q86X55	CARM1	Histone-arginine methyltransferase CARM1	14.5	1107.55	369.855	3	0.13	R	MLESYLHAK	K	M(Oxidation)LESYLHAK	Oxidation@268	0	Z20190122-03_FTMSms2EThcd	17.058	2810	268	41.6	3.1e-06	65854.3
Q86X55	CARM1	Histone-arginine methyltransferase CARM1	14.5	1091.56	364.523	3	0.23	R	MLESYLHAK	K	MLESYLHAK		0	Z20190122-03_FTMSms2EThcd	21.459	3698	268	36.2	1.1e-06	65854.3
Q86X55	CARM1	Histone-arginine methyltransferase CARM1	14.5	1027.48	514.246	2	-0.4	R	GAAVDEYFR	Q	GAAVDEYFR		0	Z20190122-03_FTMSms2EThcd	30.034	5293	328	45.5	6.6e-06	65854.3
Q86X55	CARM1	Histone-arginine methyltransferase CARM1	14.5	1189.62	595.315	2	0.64	R	QPVVDTFDIR	I	QPVVDTFDIR		0	Z20190122-03_FTMSms2EThcd	39.129	6895	337	28.3	3.7e-07	65854.3
Q86X55	CARM1	Histone-arginine methyltransferase CARM1	14.5	1533.79	767.4	2	-0.39	K	AGDTLSGTCLLIANK	R	AGDTLSGTC(Carbamidomethyl)LLIANK		0	Z20190122-03_FTMSms2EThcd	41.582	7343	430	51.4	1.4e-06	65854.3
Q86X55	CARM1	Histone-arginine methyltransferase CARM1	14.5	1689.9	563.97	3	0.13	K	AGDTLSGTCLLIANKR	Q	AGDTLSGTC(Carbamidomethyl)LLIANKR		1	Z20190122-03_FTMSms2EThcd	34.436	6074	430	55.1	7.6e-09	65854.3
P11142	HSPA8	Heat shock cognate 71 kDa protein	16.3	1487.7	744.356	2	1.7	R	TTPSYVAFTDTER	L	TTPSYVAFTDTER		0	Z20190122-03_FTMSms2EThcd	35.081	6183	37	43.9	2.7e-06	70898.7
P11142	HSPA8	Heat shock cognate 71 kDa protein	16.3	1665.79	833.398	2	-0.46	K	NQVAMNPTNTVFDAK	R	NQVAM(Oxidation)NPTNTVFDAK	Oxidation@61	0	Z20190122-03_FTMSms2EThcd	29.369	5165	57	56.5	5.5e-08	70898.7
P11142	HSPA8	Heat shock cognate 71 kDa protein	16.3	1426.66	476.226	3	0.24	R	RFDDAVVQSDMK	H	RFDDAVVQSDM(Oxidation)K	Oxidation@87	1	Z20190122-03_FTMSms2EThcd	16.771	2737	77	26.2	1.8e-06	70898.7
P11142	HSPA8	Heat shock cognate 71 kDa protein	16.3	1252.66	418.225	3	-0.59	K	MKEIAEAYLGK	T	MKEIAEAYLGK		1	Z20190122-03_FTMSms2EThcd	26.525	4646	127	46.3	1.5e-09	70898.7
P11142	HSPA8	Heat shock cognate 71 kDa protein	16.3	1787.99	596.669	3	1.8	R	IINEPTAAAIAYGLDKK	V	IINEPTAAAIAYGLDKK		1	Z20190122-03_FTMSms2EThcd	41.89	7398	172	37.6	3.8e-07	70898.7
P11142	HSPA8	Heat shock cognate 71 kDa protein	16.3	1691.73	564.581	3	0.81	K	STAGDTHLGGEDFDNR	M	STAGDTHLGGEDFDNR		0	Z20190122-03_FTMSms2EThcd	17.241	2863	221	49.2	1.8e-11	70898.7
P11142	HSPA8	Heat shock cognate 71 kDa protein	16.3	1251.62	417.878	3	-0.41	R	MVNHFIAEFK	R	M(Oxidation)VNHFIAEFK	Oxidation@237	0	Z20190122-03_FTMSms2EThcd	28.786	5060	237	36.8	9.6e-09	70898.7
P11142	HSPA8	Heat shock cognate 71 kDa protein	16.3	1319.6	660.302	2	1.9	K	NSLESYAFNMK	A	NSLESYAFNM(Oxidation)K	Oxidation@549	0	Z20190122-03_FTMSms2EThcd	33.016	5831	540	43.2	6.1e-08	70898.7
P0DMV8	HSPA1A	Heat shock 70 kDa protein 1A	9.2	1487.7	744.356	2	1.7	R	TTPSYVAFTDTER	L	TTPSYVAFTDTER		0	Z20190122-03_FTMSms2EThcd	35.081	6183	37	43.9	2.7e-06	70052.8
P0DMV8	HSPA1A	Heat shock 70 kDa protein 1A	9.2	1138.61	380.208	3	-0.19	K	VQVSYKGETK	A	VQVSYKGETK		1	Z20190122-03_FTMSms2EThcd	9.114	1370	103	33.6	1.9e-06	70052.8
P0DMV8	HSPA1A	Heat shock 70 kDa protein 1A	9.2	1261.66	421.224	3	-0.56	R	LVNHFVEEFK	R	LVNHFVEEFK		0	Z20190122-03_FTMSms2EThcd	31.982	5652	237	31.6	4.6e-08	70052.8
P0DMV8	HSPA1A	Heat shock 70 kDa protein 1A	9.2	1417.76	473.258	3	-0.08	R	LVNHFVEEFKR	K	LVNHFVEEFKR		1	Z20190122-03_FTMSms2EThcd	26.338	4613	237	36.2	2e-06	70052.8
P0DMV8	HSPA1A	Heat shock 70 kDa protein 1A	9.2	1465.81	489.276	3	0.27	K	AQIHDLVLVGGSTR	I	AQIHDLVLVGGSTR		0	Z20190122-03_FTMSms2EThcd	32.251	5699	329	54.9	5.6e-10	70052.8
P0DMV8	HSPA1A	Heat shock 70 kDa protein 1A	9.2	1303.6	652.303	2	-0.3	K	NALESYAFNMK	S	NALESYAFNM(Oxidation)K	Oxidation@549	0	Z20190122-03_FTMSms2EThcd	33.794	5967	540	43	3.9e-07	70052.8
P0DMV9	HSPA1B	Heat shock 70 kDa protein 1B	9.2	1487.7	744.356	2	1.7	R	TTPSYVAFTDTER	L	TTPSYVAFTDTER		0	Z20190122-03_FTMSms2EThcd	35.081	6183	37	43.9	2.7e-06	70052.8
P0DMV9	HSPA1B	Heat shock 70 kDa protein 1B	9.2	1138.61	380.208	3	-0.19	K	VQVSYKGETK	A	VQVSYKGETK		1	Z20190122-03_FTMSms2EThcd	9.114	1370	103	33.6	1.9e-06	70052.8
P0DMV9	HSPA1B	Heat shock 70 kDa protein 1B	9.2	1261.66	421.224	3	-0.56	R	LVNHFVEEFK	R	LVNHFVEEFK		0	Z20190122-03_FTMSms2EThcd	31.982	5652	237	31.6	4.6e-08	70052.8
P0DMV9	HSPA1B	Heat shock 70 kDa protein 1B	9.2	1417.76	473.258	3	-0.08	R	LVNHFVEEFKR	K	LVNHFVEEFKR		1	Z20190122-03_FTMSms2EThcd	26.338	4613	237	36.2	2e-06	70052.8
P0DMV9	HSPA1B	Heat shock 70 kDa protein 1B	9.2	1465.81	489.276	3	0.27	K	AQIHDLVLVGGSTR	I	AQIHDLVLVGGSTR		0	Z20190122-03_FTMSms2EThcd	32.251	5699	329	54.9	5.6e-10	70052.8
P0DMV9	HSPA1B	Heat shock 70 kDa protein 1B	9.2	1303.6	652.303	2	-0.3	K	NALESYAFNMK	S	NALESYAFNM(Oxidation)K	Oxidation@549	0	Z20190122-03_FTMSms2EThcd	33.794	5967	540	43	3.9e-07	70052.8
P34931	HSPA1L	Heat shock 70 kDa protein 1-like	3.7	1487.7	744.356	2	1.7	R	TTPSYVAFTDTER	L	TTPSYVAFTDTER		0	Z20190122-03_FTMSms2EThcd	35.081	6183	39	43.9	2.7e-06	70375.6
P34931	HSPA1L	Heat shock 70 kDa protein 1-like	3.7	1303.6	652.303	2	-0.3	K	NALESYAFNMK	S	NALESYAFNM(Oxidation)K	Oxidation@551	0	Z20190122-03_FTMSms2EThcd	33.794	5967	542	43	3.9e-07	70375.6
Q14119	VEZF1	Vascular endothelial zinc finger 1	14.6	1539.75	385.692	4	-0.74	K	GFSRPDHLSCHVK	H	GFSRPDHLSC(Carbamidomethyl)HVK		0	Z20190122-03_FTMSms2EThcd	10.313	1578	240	36.7	5.8e-10	56931.8
Q14119	VEZF1	Vascular endothelial zinc finger 1	14.6	1258.56	629.782	2	0.84	K	CQTCTAAFATK	D	C(Carbamidomethyl)QTC(Carbamidomethyl)TAAFATK		0	Z20190122-03_FTMSms2EThcd	16.242	2624	263	38.5	3.9e-09	56931.8
Q14119	VEZF1	Vascular endothelial zinc finger 1	14.6	1316.76	439.591	3	0.44	K	LLSAAYITSHLK	T	LLSAAYITSHLK		0	Z20190122-03_FTMSms2EThcd	40.885	7212	295	33.3	4.5e-09	56931.8
Q14119	VEZF1	Vascular endothelial zinc finger 1	14.6	1634.7	545.572	3	0.3	K	THGQSQSINCNTCK	Q	THGQSQSINC(Carbamidomethyl)NTC(Carbamidomethyl)K		0	Z20190122-03_FTMSms2EThcd	8.548	1265	307	55.3	1.5e-11	56931.8
Q14119	VEZF1	Vascular endothelial zinc finger 1	14.6	3216.53	804.888	4	0.62	K	QQQQQQQQQQQQQQQQQQHVTSWPGK	Q	QQQQQQQQQQQQQQQQQQHVTSWPGK		0	Z20190122-03_FTMSms2EThcd	16.505	2680	337	57.2	2.8e-12	56931.8
P13645	KRT10	Keratin, type I cytoskeletal 10	12.7	1381.65	691.328	2	0.69	R	ALEESNYELEGK	I	ALEESNYELEGK		0	Z20190122-03_FTMSms2EThcd	25.022	4376	166	52.3	7.5e-08	58827.5
P13645	KRT10	Keratin, type I cytoskeletal 10	12.7	1357.72	453.244	3	0.07	R	QSVEADINGLRR	V	QSVEADINGLRR		1	Z20190122-03_FTMSms2EThcd	25.367	4437	246	36.2	9.3e-07	58827.5
P13645	KRT10	Keratin, type I cytoskeletal 10	12.7	1493.74	498.585	3	4.3	R	SQYEQLAEQNRK	D	SQYEQLAEQNRK		1	Z20190122-03_FTMSms2EThcd	15.304	2422	323	54.6	3e-11	58827.5
P13645	KRT10	Keratin, type I cytoskeletal 10	12.7	1390.68	695.844	2	-0.1	K	QSLEASLAETEGR	Y	QSLEASLAETEGR		0	Z20190122-03_FTMSms2EThcd	32.389	5725	387	51.3	1.4e-05	58827.5
P13645	KRT10	Keratin, type I cytoskeletal 10	12.7	1434.77	478.928	3	0.27	K	IRLENEIQTYR	S	IRLENEIQTYR		1	Z20190122-03_FTMSms2EThcd	29.428	5176	440	46.3	3e-07	58827.5
P13645	KRT10	Keratin, type I cytoskeletal 10	12.7	1262.6	631.802	2	-0.0082	R	SLLEGEGSSGGGGR	G	SLLEGEGSSGGGGR		0	Z20190122-03_FTMSms2EThcd	16.838	2755	451	52.2	7.6e-07	58827.5
P35527	KRT9	Keratin, type I cytoskeletal 9	11.1	1232.6	616.805	2	3.8	R	SGGGGGGGLGSGGSIR	S	SGGGGGGGLGSGGSIR		0	Z20190122-03_FTMSms2EThcd	13.63	2097	14	52.1	2.5e-06	62064.8
P35527	KRT9	Keratin, type I cytoskeletal 9	11.1	1235.53	618.269	2	0.97	R	FSSSSGYGGGSSR	V	FSSSSGYGGGSSR		0	Z20190122-03_FTMSms2EThcd	9.628	1462	47	43	2.5e-11	62064.8
P35527	KRT9	Keratin, type I cytoskeletal 9	11.1	1586.77	793.888	2	1.8	K	VQALEEANNDLENK	I	VQALEEANNDLENK		0	Z20190122-03_FTMSms2EThcd	27.56	4820	171	36.4	6.6e-07	62064.8
P35527	KRT9	Keratin, type I cytoskeletal 9	11.1	1157.59	579.299	2	-0.87	R	QGVDADINGLR	Q	QGVDADINGLR		0	Z20190122-03_FTMSms2EThcd	28.912	5085	251	46.3	4.5e-06	62064.8
P35527	KRT9	Keratin, type I cytoskeletal 9	11.1	1867.92	623.312	3	0.27	K	TLNDMRQEYEQLIAK	N	TLNDM(Oxidation)RQEYEQLIAK	Oxidation@326	1	Z20190122-03_FTMSms2EThcd	36.311	6409	322	29.4	3.9e-07	62064.8
P28702	RXRB	Retinoic acid receptor RXR-beta	12.6	2959.3	987.106	3	1.9	K	SDQGVEGPGGTGGSGSSPNDPVTNICQAADK	Q	SDQGVEGPGGTGGSGSSPNDPVTNIC(Carbamidomethyl)QAADK		0	Z20190122-03_FTMSms2EThcd	36.972	6525	315	25.3	2.4e-09	56922.4
P28702	RXRB	Retinoic acid receptor RXR-beta	12.6	1401.69	467.901	3	-0.0035	R	NSAHSAGVGAIFDR	V	NSAHSAGVGAIFDR		0	Z20190122-03_FTMSms2EThcd	24.915	4356	406	52	1.4e-11	56922.4
P28702	RXRB	Retinoic acid receptor RXR-beta	12.6	1299.69	650.349	2	0.78	K	GLSNPSEVEVLR	E	GLSNPSEVEVLR		0	Z20190122-03_FTMSms2EThcd	34.757	6127	453	37.8	1.2e-05	56922.4
P28702	RXRB	Retinoic acid receptor RXR-beta	12.6	1233.58	617.294	2	-0.55	K	VYASLETYCK	Q	VYASLETYC(Carbamidomethyl)K		0	Z20190122-03_FTMSms2EThcd	27.596	4827	467	41.8	1.3e-09	56922.4
P19793	RXRA	Retinoic acid receptor RXR-alpha	5.4	1211.69	606.349	2	1.6	R	ILEAELAVEPK	T	ILEAELAVEPK		0	Z20190122-03_FTMSms2EThcd	37.891	6682	235	37.9	1.2e-05	50811.8
P19793	RXRA	Retinoic acid receptor RXR-alpha	5.4	1401.69	467.901	3	-0.0035	R	NSAHSAGVGAIFDR	V	NSAHSAGVGAIFDR		0	Z20190122-03_FTMSms2EThcd	24.915	4356	335	52	1.4e-11	50811.8
Q96SK2	TMEM209	Transmembrane protein 209	10.2	2335.04	779.019	3	1.2	R	SSPTVYNSPTDKEDYMTDLR	T	SSPTVYNSPTDKEDYM(Oxidation)TDLR	Oxidation@236	1	Z20190122-03_FTMSms2EThcd	29.773	5239	221	60.9	3.5e-14	62922.2
Q96SK2	TMEM209	Transmembrane protein 209	10.2	1720.78	574.265	3	0.054	R	SQAPCANKDEADLSSK	Q	SQAPC(Carbamidomethyl)ANKDEADLSSK		1	Z20190122-03_FTMSms2EThcd	9.8	1491	297	49.1	3.1e-09	62922.2
Q96SK2	TMEM209	Transmembrane protein 209	10.2	1059.52	530.264	2	-0.057	K	QAAEEVWAR	V	QAAEEVWAR		0	Z20190122-03_FTMSms2EThcd	18.226	3092	313	46.7	1.2e-05	62922.2
Q96SK2	TMEM209	Transmembrane protein 209	10.2	1460.68	487.566	3	0.14	R	QLLDHMDSWTAK	F	QLLDHM(Oxidation)DSWTAK	Oxidation@332	0	Z20190122-03_FTMSms2EThcd	25.324	4429	327	31.6	1.4e-06	62922.2
P08670	VIM	Vimentin	11.4	1428.71	714.86	2	0.67	R	SLYASSPGGVYATR	S	SLYASSPGGVYATR		0	Z20190122-03_FTMSms2EThcd	29.616	5211	51	43.1	3.6e-07	53652.1
P08670	VIM	Vimentin	11.4	1270.56	635.785	2	0.42	R	LGDLYEEEMR	E	LGDLYEEEM(Oxidation)R	Oxidation@154	0	Z20190122-03_FTMSms2EThcd	25.518	4463	146	29.4	1.9e-09	53652.1
P08670	VIM	Vimentin	11.4	1704.82	568.945	3	-0.46	R	VEVERDNLAEDIMR	L	VEVERDNLAEDIM(Oxidation)R	Oxidation@183	1	Z20190122-03_FTMSms2EThcd	29.465	5183	171	47.4	1.2e-07	53652.1
P08670	VIM	Vimentin	11.4	1668.84	556.953	3	-0.22	R	ETNLDSLPLVDTHSK	R	ETNLDSLPLVDTHSK		0	Z20190122-03_FTMSms2EThcd	37.832	6672	425	32.5	2.4e-08	53652.1
P40227	CCT6A	T-complex protein 1 subunit zeta	4.7	1498.76	500.259	3	-0.81	K	QADLYISEGLHPR	I	QADLYISEGLHPR		0	Z20190122-03_FTMSms2EThcd	31.936	5644	105	42.8	6.6e-09	58024.7
P40227	CCT6A	T-complex protein 1 subunit zeta	4.7	1463.71	488.576	3	-0.83	R	EMDRETLIDVAR	T	EM(Oxidation)DRETLIDVAR	Oxidation@143	1	Z20190122-03_FTMSms2EThcd	26.621	4662	142	46	3.2e-09	58024.7
P40227	CCT6A	T-complex protein 1 subunit zeta	4.7	1447.72	483.245	3	-0.97	R	EMDRETLIDVAR	T	EMDRETLIDVAR		1	Z20190122-03_FTMSms2EThcd	32.909	5811	142	37.4	2.6e-08	58024.7
P60709	ACTB	Actin, cytoplasmic 1	7.5	976.448	488.728	2	-0.57	K	AGFAGDDAPR	A	AGFAGDDAPR		0	Z20190122-03_FTMSms2EThcd	15.858	2545	19	36.1	1.8e-06	41737.1
P60709	ACTB	Actin, cytoplasmic 1	7.5	1954.07	652.027	3	1	R	VAPEEHPVLLTEAPLNPK	A	VAPEEHPVLLTEAPLNPK		0	Z20190122-03_FTMSms2EThcd	38.871	6849	96	63.2	1.7e-14	41737.1
Q07869	PPARA	Peroxisome proliferator-activated receptor alpha	5.8	1695.7	565.905	3	0.66	K	ASGYHYGVHACEGCK	G	ASGYHYGVHAC(Carbamidomethyl)EGC(Carbamidomethyl)K		0	Z20190122-03_FTMSms2EThcd	9.934	1514	109	29.5	8.1e-08	52225.6
Q07869	PPARA	Peroxisome proliferator-activated receptor alpha	5.8	1360.65	454.22	3	-0.64	K	CLSVGMSHNAIR	F	C(Carbamidomethyl)LSVGM(Oxidation)SHNAIR	Oxidation@166	0	Z20190122-03_FTMSms2EThcd	15.177	2392	161	43.6	2.5e-07	52225.6
P14618	PKM	Pyruvate kinase PKM	4.5	1359.71	680.357	2	0.89	R	NTGIICTIGPASR	S	NTGIIC(Carbamidomethyl)TIGPASR		0	Z20190122-03_FTMSms2EThcd	32.929	5815	44	53	1.7e-06	57937.4
P14618	PKM	Pyruvate kinase PKM	4.5	1141.61	571.308	2	-0.36	R	GDLGIEIPAEK	V	GDLGIEIPAEK		0	Z20190122-03_FTMSms2EThcd	38.733	6825	295	42.3	3.4e-07	57937.4
P51610	HCFC1	Host cell factor 1	1.3	1158.63	386.88	3	0.055	R	LGHSFSLVGNK	C	LGHSFSLVGNK		0	Z20190122-03_FTMSms2EThcd	18.087	3068	138	31.5	1.2e-07	208734
P51610	HCFC1	Host cell factor 1	1.3	1402.76	468.257	3	1.1	R	ISVATGALEAAQGSK	S	ISVATGALEAAQGSK		0	Z20190122-03_FTMSms2EThcd	33.023	5832	1149	37.7	3.3e-07	208734
P50990	CCT8	T-complex protein 1 subunit theta	5.3	1372.74	686.875	2	-0.4	K	AIADTGANVVVTGGK	V	AIADTGANVVVTGGK		0	Z20190122-03_FTMSms2EThcd	27.399	4792	282	45.9	9.2e-06	59621.1
P50990	CCT8	T-complex protein 1 subunit theta	5.3	1354.76	677.883	2	0.2	R	LVPGGGATEIELAK	Q	LVPGGGATEIELAK		0	Z20190122-03_FTMSms2EThcd	35.987	6355	408	31.2	7.5e-07	59621.1
P01024	C3	Complement C3	1.6	1370.73	685.87	2	1.5	K	TIYTPGSTVLYR	I	TIYTPGSTVLYR		0	Z20190122-03_FTMSms2EThcd	38.185	6733	137	38	1.2e-06	187150
P01024	C3	Complement C3	1.6	1511.82	756.415	2	0.71	R	LVAYYTLIGASGQR	E	LVAYYTLIGASGQR		0	Z20190122-03_FTMSms2EThcd	46.885	8322	531	29.4	4e-06	187150
P68363	TUBA1B	Tubulin alpha-1B chain	5.3	1718.88	573.632	3	0.36	R	NLDIERPTYTNLNR	L	NLDIERPTYTNLNR		0	Z20190122-03_FTMSms2EThcd	33.135	5851	216	38.6	4.8e-06	50152.1
P68363	TUBA1B	Tubulin alpha-1B chain	5.3	1015.58	508.293	2	1.1	K	DVNAAIATIK	T	DVNAAIATIK		0	Z20190122-03_FTMSms2EThcd	33.058	5838	327	41.1	1.2e-05	50152.1
Q96TA2	YME1L1	ATP-dependent zinc metalloprotease YME1L1	3.2	1417.74	709.375	2	-18	R	LAETQNIAPSFVK	G	LAETQNIAPSFVK		0	Z20190122-03_FTMSms2EThcd	37.293	6578	225	36.9	1.5e-05	86456
Q96TA2	YME1L1	ATP-dependent zinc metalloprotease YME1L1	3.2	1108.67	554.841	2	1.1	K	GILLVGPPGTGK	T	GILLVGPPGTGK		0	Z20190122-03_FTMSms2EThcd	39.545	6966	374	27.1	4.6e-06	86456
O75533	SF3B1	Splicing factor 3B subunit 1	4.9	2937.31	979.774	3	2	K	AALDEAQGVGLDSTGYYDQEIYGGSDSR	F	AALDEAQGVGLDSTGYYDQEIYGGSDSR		0	Z20190122-03_FTMSms2EThcd	51.545	9145	23	22.7	8.7e-08	145832
O75533	SF3B1	Splicing factor 3B subunit 1	4.9	3958.97	990.497	4	1.3	K	LEEQLIDGILYAFQEQTTEDSVMLNGFGTVVNALGK	R	LEEQLIDGILYAFQEQTTEDSVM(Oxidation)LNGFGTVVNALGK	Oxidation@910	0	Z20190122-03_FTMSms2EThcd	89.686	15138	888	31.2	1e-06	145832
A0A0A0MS14	IGHV1-45	Immunoglobulin heavy variable 1-45	9.4	1382.54	691.771	2	0.29	R	SEDTAMYYCAR	-	SEDTAM(Oxidation)YYC(Carbamidomethyl)AR	Oxidation@112	0	Z20190122-03_FTMSms2EThcd	16.977	2788	107	55.1	2e-14	13508.5
P48643	CCT5	T-complex protein 1 subunit epsilon	4.1	1438.73	480.247	3	0.84	K	EKFEEMIQQIK	E	EKFEEM(Oxidation)IQQIK	Oxidation@288	1	Z20190122-03_FTMSms2EThcd	26.498	4641	283	29.9	5.4e-06	59671.6
P48643	CCT5	T-complex protein 1 subunit epsilon	4.1	1265.72	422.579	3	-0.21	K	QQHVIETLIGK	K	QQHVIETLIGK		0	Z20190122-03_FTMSms2EThcd	29.049	5110	503	27.3	7.9e-07	59671.6
P25490	YY1	Transcriptional repressor protein YY1	5.1	1791.86	597.959	3	-0.26	K	SYLSGGAGAAGGGGADPGNKK	W	SYLSGGAGAAGGGGADPGNKK		1	Z20190122-03_FTMSms2EThcd	15.778	2525	184	71.2	2.3e-12	44712.9
Q13547	HDAC1	Histone deacetylase 1	3.9	2249.05	750.355	3	0.6	K	LHISPSNMTNQNTNEYLEK	I	LHISPSNM(Oxidation)TNQNTNEYLEK	Oxidation@350	0	Z20190122-03_FTMSms2EThcd	26.448	4632	343	53.8	1.7e-11	55103.5
P53985	SLC16A1	Monocarboxylate transporter 1	2.4	1339.66	447.225	3	0.95	K	DLHDANTDLIGR	H	DLHDANTDLIGR		0	Z20190122-03_FTMSms2EThcd	27.117	4746	225	37.5	7.1e-10	53944.7
P04844	RPN2	Dolichyl-diphosphooligosaccharide--protein glycosyltransferase subunit 2	2.2	1532.76	766.884	2	0.4	K	TGQEVVFVAEPDNK	N	TGQEVVFVAEPDNK		0	Z20190122-03_FTMSms2EThcd	32.837	5799	443	46.1	3.3e-08	69284.6
P02768	ALB	Serum albumin	2.5	1639.94	547.318	3	0.67	K	KVPQVSTPTLVEVSR	N	KVPQVSTPTLVEVSR		1	Z20190122-03_FTMSms2EThcd	34.338	6058	438	43	1.1e-07	69367.4
P0CG47	UBB	Polyubiquitin-B	5.7	1523.78	508.599	3	0.39	K	IQDKEGIPPDQQR	L	IQDKEGIPPDQQR		1	Z20190122-03_FTMSms2EThcd	9.656	1466	30	42	1.3e-07	25761.8
P10809	HSPD1	60 kDa heat shock protein, mitochondrial	4.4	2560.25	854.089	3	2	K	LVQDVANNTNEEAGDGTTTATVLAR	S	LVQDVANNTNEEAGDGTTTATVLAR		0	Z20190122-03_FTMSms2EThcd	37.57	6626	97	36.1	1.5e-07	61055.2
P68104	EEF1A1	Elongation factor 1-alpha 1	2.6	1404.73	468.914	3	0.3	K	YYVTIIDAPGHR	D	YYVTIIDAPGHR		0	Z20190122-03_FTMSms2EThcd	34.085	6015	85	34.1	8.3e-07	50141.3
P48443	RXRG	Retinoic acid receptor RXR-gamma	2.4	1211.69	606.349	2	1.6	R	ILEAELAVEPK	T	ILEAELAVEPK		0	Z20190122-03_FTMSms2EThcd	37.891	6682	239	37.9	1.2e-05	50871.7
Q13670	PMS2P11	Putative postmeiotic segregation increased 2-like protein 11	5.2	1400.65	700.831	2	0.39	K	LSAASGYSDVTDSK	A	LSAASGYSDVTDSK		0	Z20190122-03_FTMSms2EThcd	17.863	3028	4	36	5e-06	28554.9
P26368	U2AF2	Splicing factor U2AF 65 kDa subunit	1.9	1086.44	543.723	2	0.62	-	MSDFDEFER	Q	M(Met-loss+Acetyl)SDFDEFER	Met-loss+Acetyl@1	0	Z20190122-03_FTMSms2EThcd	43.793	7753	1	30.4	6.4e-07	53501.5
Q3SY84	KRT71	Keratin, type II cytoskeletal 71	1.9	1132.61	566.809	2	-0.19	K	FQELQLAAGR	H	FQELQLAAGR		0	Z20190122-03_FTMSms2EThcd	33.567	5928	327	31.3	1.4e-06	57292
O43242	PSMD3	26S proteasome non-ATPase regulatory subunit 3	1.9	1179.6	590.304	2	0.25	K	AIQLEYSEAR	R	AIQLEYSEAR		0	Z20190122-03_FTMSms2EThcd	27.795	4863	297	33.1	9.9e-06	60978.1
P08243	ASNS	Asparagine synthetase [glutamine-hydrolyzing]	2.3	1512.77	504.928	3	0.5	R	DVPLHALYDNVEK	L	DVPLHALYDNVEK		0	Z20190122-03_FTMSms2EThcd	40.818	7200	209	26.6	3.4e-07	64370.5
P0DN79	CBSL	Cystathionine beta-synthase-like protein	2	1286.57	643.786	2	0.58	K	SNDEEAFTFAR	M	SNDEEAFTFAR		0	Z20190122-03_FTMSms2EThcd	34.183	6032	326	25.8	3e-07	60587.1
O15482	TEX28	Testis-specific protein TEX28	2.2	1076.47	359.496	3	6.4	R	DGNTVSYLK	L	DGNT(Phospho)VSYLK	Phospho@73=22	0	Z20190122-03_FTMSms2EThcd	23.135	4019	70	17.8	4.8e-07	46131.9
Q96LW9	ZSCAN31	Zinc finger and SCAN domain-containing protein 31	2.7	1597.64	533.218	3	3.5	-	MASTEEQYDLK	I	MAS(Phospho)T(HexNAc)EEQYDLK	HexNAc&Phospho@((3&4)|(4&3))	0	Z20190122-03_FTMSms2EThcd	28.712	5046	1	16.8	1.2e-06	47293.5
