# Supplementary material for: O-GlcNAc glycosylation orchestrates fate decision and niche function of bone marrow stromal progenitors
Source: eLife journal article supplement (doi:10.7554/elife.85464), 2023-03-02
Supplement: supp [file Figure 5 —source data 1.xlsx]

## Sheet: Sheet1
Protein target	Conjugation	Source	Catlog No.	RRID
mouse Lineage Panel	Biotin	Biolegend	133307	AB_11124348
CD4	Biotin	Biolegend	100404	AB_312689
CD5	Biotin	Biolegend	100604	AB_312733
CD8a	Biotin	Biolegend	100704	AB_312743
Streptavidin	AF488	Biolegend	405235	N/A
CD127	APC	Life Technologies	17-1271-82	AB_469435
CD117 (c-Kit)	APC-eFluor 780	Life Technologies	47-1171-80	AB_1272213
Ly-6A/E (Sca-1)	Super Bright 436	Life Technologies	62-5981-82	AB_2637287
CD34	PE	Biolegend	152204	AB_2629648
CD48	BUV395	BD Biosciences	740236	AB_2739984
CD150	BV605	Biolegend	115927	AB_11204248
CD16/CD32	PerCP-eFluor 710	Life Technologies	46-0161-82	AB_2016701
B220	Super Bright 702	Life Technologies	67-0452-82	AB_2744882
CD43	PE	BD Biosciences	553271	AB_394748
CD24	PE/Cy7	Biolegend	101822	AB_756048
Ly-51	FITC	Biolegend	108305	AB_313362
CD127	APC	Tonbo Biosciences	20-1271	AB_2621588
CD25	Super Bright 600	Life Technologies	63-0251-82	AB_2717029
CD19	BV510	Biolegend	115545	AB_2562136
Perilipin		Cell signaling Technology	#9349	AB_10829911
