# Supplementary material for: O-GlcNAc glycosylation orchestrates fate decision and niche function of bone marrow stromal progenitors
Source: eLife journal article supplement (doi:10.7554/elife.85464), 2023-03-02
Supplement: supp [file Figure 6 —source data 1.xlsx]

## Sheet: S3. Primers
Gene	Fwd primer sequence (5'→3')	Rev primer sequence (5'→3')
Adipoq	TCCTGGAGAGAAGGGAGAGAA	TGAGCGATACACATAAGCGGC
Vcam	GACCATGGAGCCTGTCAGTT	AATCTCTGGATCCTTGGGGA
Pparg	CAAGAATACCAAAGTGCGATCAA	GAGCTGGGTCTTTTCAGAATAATAAG
kitl	GAAGACACAAACTTGGATTATCACT	CATCCCGGCGACATAGTTGA
Il7	CTGATGATCAGCATCGATGAATTGG	GCAGCACGATTTAGAAAAGCAGCTT
Bglap	AGCAGGAGGGCAATAAGGTA	CAAGCAGGGTTAAGCTCACA
Rankl	GCAGAAGGAACTGCAACACA	TGATGGTGAGGTGTGCAAAT
