# Supplementary material for: O-GlcNAc glycosylation orchestrates fate decision and niche function of bone marrow stromal progenitors
Source: eLife journal article supplement (doi:10.7554/elife.85464), 2023-03-02
Supplement: supp [file Table S2.xlsx]

## Sheet: S2.Pparg2
Modification	AA	Site on recombinant PPARg2	Site on PPARg2	SLIP	Num Unique	% Cov	Best Disc Score	Best Expect Val	m/z	z	ppm	DB Peptide	Peptide	Protein Mods	RT	MSMS Info	Score	Expect
HexNAc	S	128	S104	13	61	58.2	7.95	9.4e-16	877.435	3	1	LQEYQSAIKVEPASPPYYSEK	LQEYQS(HexNAc)AIKVEPASPPYYSEK	HexNAc@128=13	37.162	6557	47.2	2.8e-09
HexNAc	S	157	S133	20	61	58.2	7.95	9.4e-16	691.822	4	-0.27	TQLYNRPHEEPSNSLMAIECR	TQLYNRPHEEPSNS(HexNAc)LM(Oxidation)AIEC(Carbamidomethyl)R	HexNAc@157=20;Oxidation@159	26.784	4689	52.8	4.8e-10
HexNAc	S	394	S370	61	61	58.2	7.95	9.4e-16	576.942	3	0.84	DGVLISEGQGFMTR	DGVLIS(HexNAc)EGQGFM(Oxidation)TR	HexNAc@394=61;Oxidation@400	38.14	6725	37.2	9e-08
HexNAc	T	511	T487	14	61	58.2	7.95	9.4e-16	567.039	4	1.4	KTETDMSLHPLLQEIYK	KT(HexNAc)ETDM(Oxidation)SLHPLLQEIYK	HexNAc@511=14;Oxidation@515	37.82	6670	49	3.4e-09
Recombinant PPARg2 Protein Seq
Myc
N-tag/linker
O-GlcNAc site
MASMQKLISEEDLLMAMEARIRSTMGETLGDSPVDPEHGAFADALPMSTSQEITMVDTEMPFWPTNFGISSVDLSVMEDHSHSFDIKPFTTVDFSSISAPHYEDIPFTRADPMVADYKYDLKLQEYQSAIKVEPASPPYYSEKTQLYNRPHEEPSNSLMAIECRVCGDKASGFHYGVHACEGCKGFFRRTIRLKLIYDRCDLNCRIHKKSRNKCQYCRFQKCLAVGMSHNAIRFGRMPQAEKEKLLAEISSDIDQLNPESADLRALAKHLYDSYIKSFPLTKAKARAILTGKTTDKSPFVIYDMNSLMMGEDKIKFKHITPLQEQSKEVAIRIFQGCQFRSVEAVQEITEYAKNIPGFINLDLNDQVTLLKYGVHEIIYTMLASLMNKDGVLISEGQGF…
